# Supplementary material for: Automated biophysical classification of apoptotic pancreatic cancer cell subpopulations by using machine learning approaches with impedance cytometry
Source: Royal Society of Chemistry journal article supplement (doi:10.1039/d2lc00304j), 2022-01-01
Supplement: d2lc00304j1.pdf [file d2lc00304j1.pdf]

**Supplementary Materials for**  
**Automated biophysical classification of apoptotic pancreatic cancer cell**  
**subpopulations by using machine learning approaches with impedance**  
**cytometry**

Carlos Honrado, Armita Salahi, Sara J. Adair, John H. Moore, Todd W. Bauer, Nathan S.  
Swami\*

\*Corresponding author. Email: [nswami@virginia.edu](mailto:nswami@virginia.edu)

**This PDF file includes:**

A. Supplementary Results  
Fig. S1 to Fig. S5  
B. Supplementary Methods  
- Dielectric Shell Modeling (Fig. S6)  
References  
References (# to #)

## A. Supplementary Results

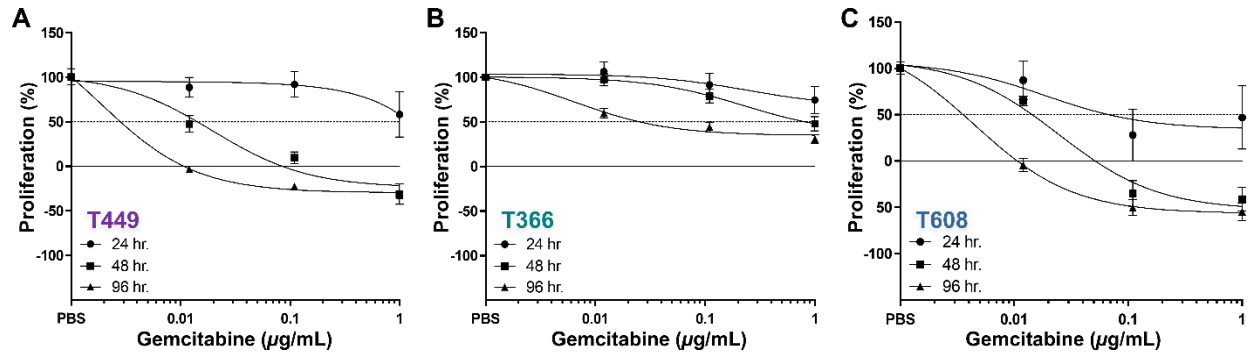

**Figure S1:** Proliferation studies on PDAC cell lines: A - T449, B – T366, and C – T608. Cell cultures were exposed to varying concentrations of gemcitabine (0.01, 0.1, and 1  $\mu\text{g mL}^{-1}$ ) for: 24 h (circle), 48 h (square) and 96 h (triangle). Proliferation (%) is calculated as the relative proliferation under each treated condition compared with untreated for each exposure period and gemcitabine concentration.

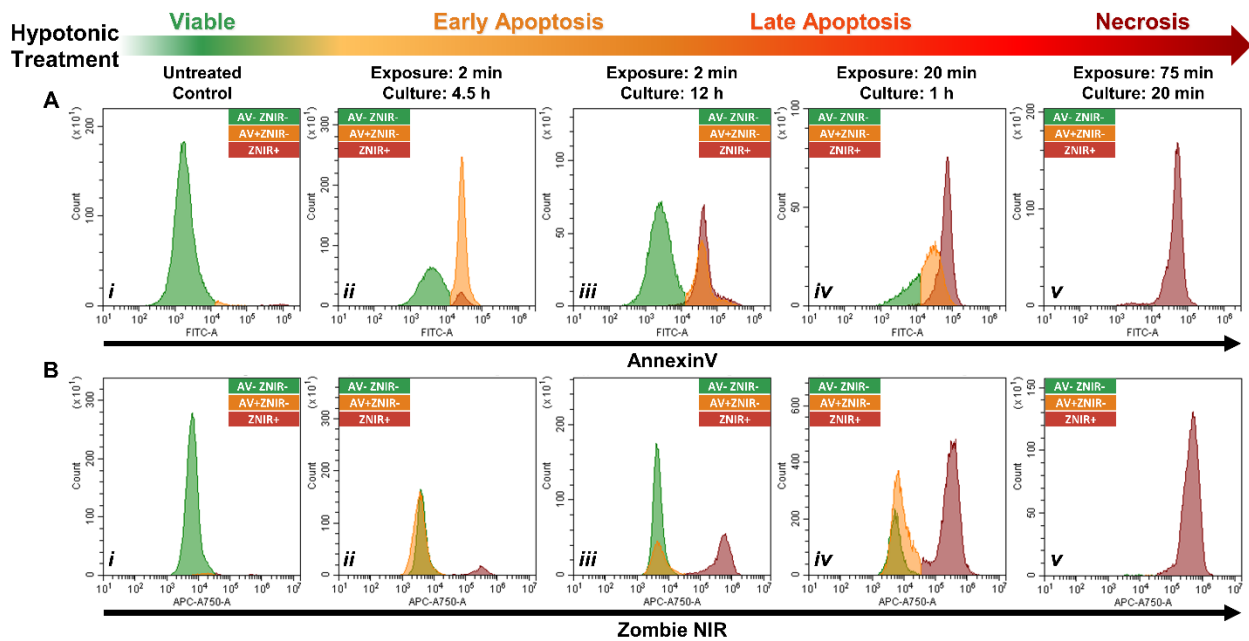

**Figure S2:** Hypotonic treatment studies on PDAC T449 cell line. Histograms A – Annexin V (AV) and B – Zombie Near-Infrared (ZNIR) show that exposing cell cultures to DI water for increasing periods of time induces cells towards apoptosis and necrosis pathways.

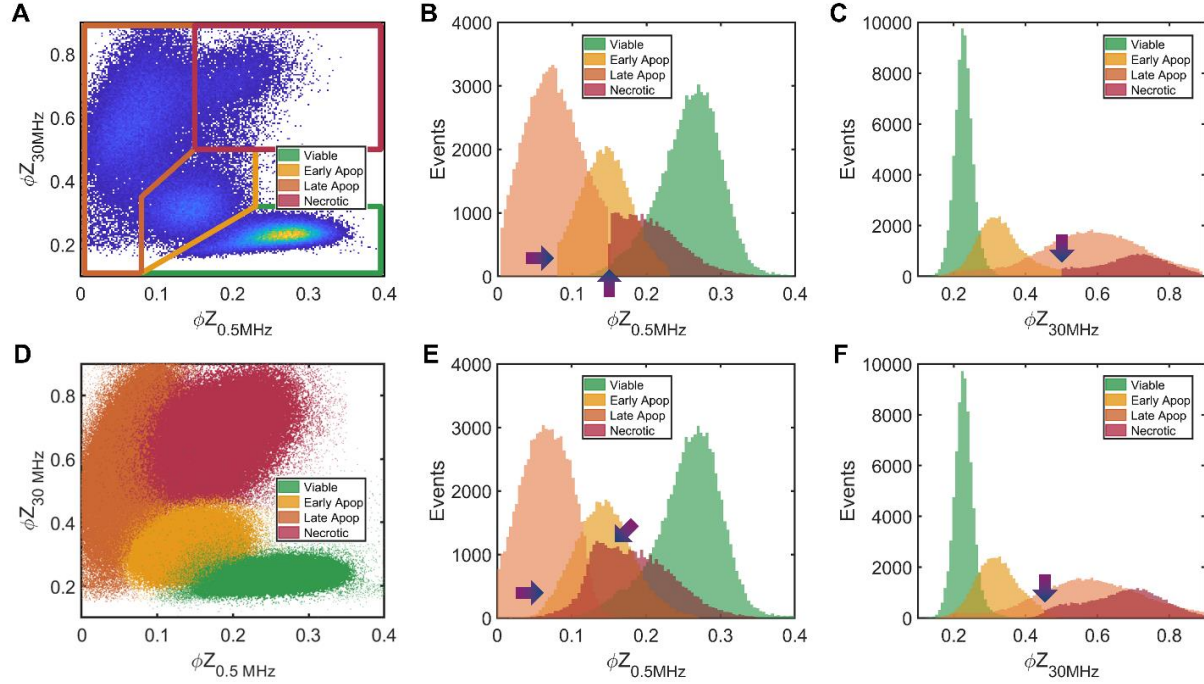

**Figure S3:** Manual gating versus clustering with unsupervised learning. A – Manual gates for each viability subpopulation applied to the density scatter plot of impedance phase at 0.5 MHz ( $\phi Z_{0.5\text{MHz}}$ ) versus impedance phase at 30 MHz ( $\phi Z_{30\text{MHz}}$ ) for merged data from the different hypotonic treatment samples. Histograms for B –  $\phi Z_{0.5\text{MHz}}$  and C –  $\phi Z_{30\text{MHz}}$  of the manually gated subpopulations. D – A Gaussian Mixture Model (GMM), with  $k = 4$  clusters, applied to cluster each viability subpopulation in the density scatter plot of impedance phase at 0.5 MHz ( $\phi Z_{0.5\text{MHz}}$ ) versus impedance phase at 30 MHz ( $\phi Z_{30\text{MHz}}$ ) for merged data from the different hypotonic treatment samples. Histograms for E –  $\phi Z_{0.5\text{MHz}}$  and F –  $\phi Z_{30\text{MHz}}$  of the machine learning gated subpopulations.

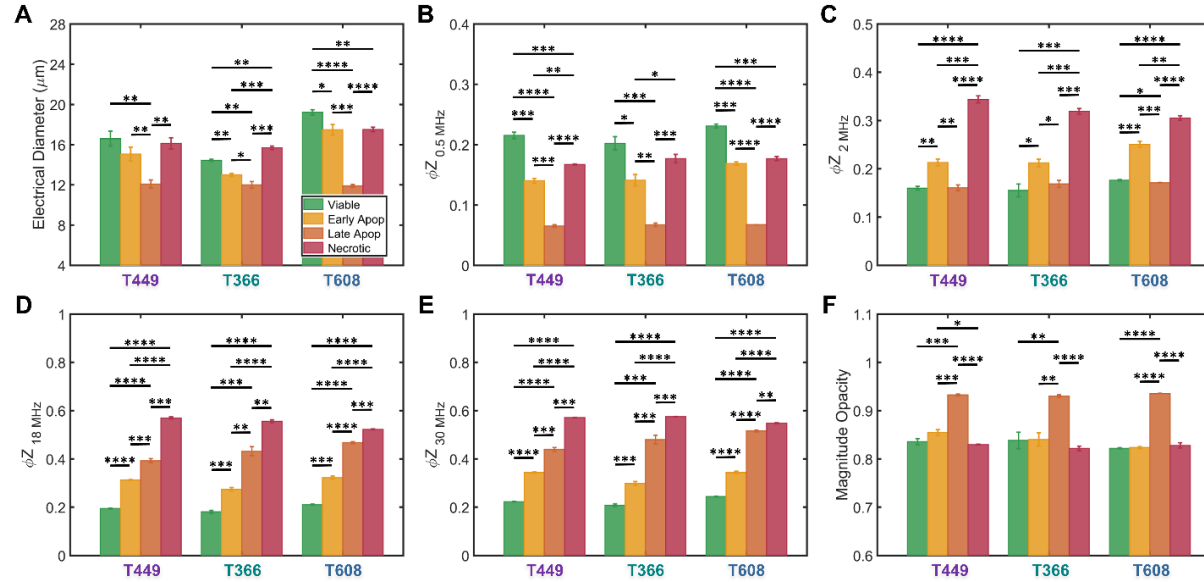

**Figure S4:** Comparison of the impedance cytometry biometrics of electrical diameter (A), impedance phase at 0.5 MHz ( $\phi Z_{0.5\text{MHz}}$ , B), at 2 MHz ( $\phi Z_{2\text{MHz}}$ , C), at 18 MHz ( $\phi Z_{18\text{MHz}}$ , D) and magnitude opacity (F).

at 30 MHz ( $\phi Z_{30\text{MHz}}$ , E), and magnitude opacity ( $|Z|_{2\text{MHz}} / |Z|_{0.5\text{MHz}}$ , F) for each untreated PDAC cell line (n = 3). Statistical significance: \*p ≤ 0.05 ; \*\*p ≤ 0.01, \*\*\*p ≤ 0.001 and \*\*\*\*p ≤ 0.00001.

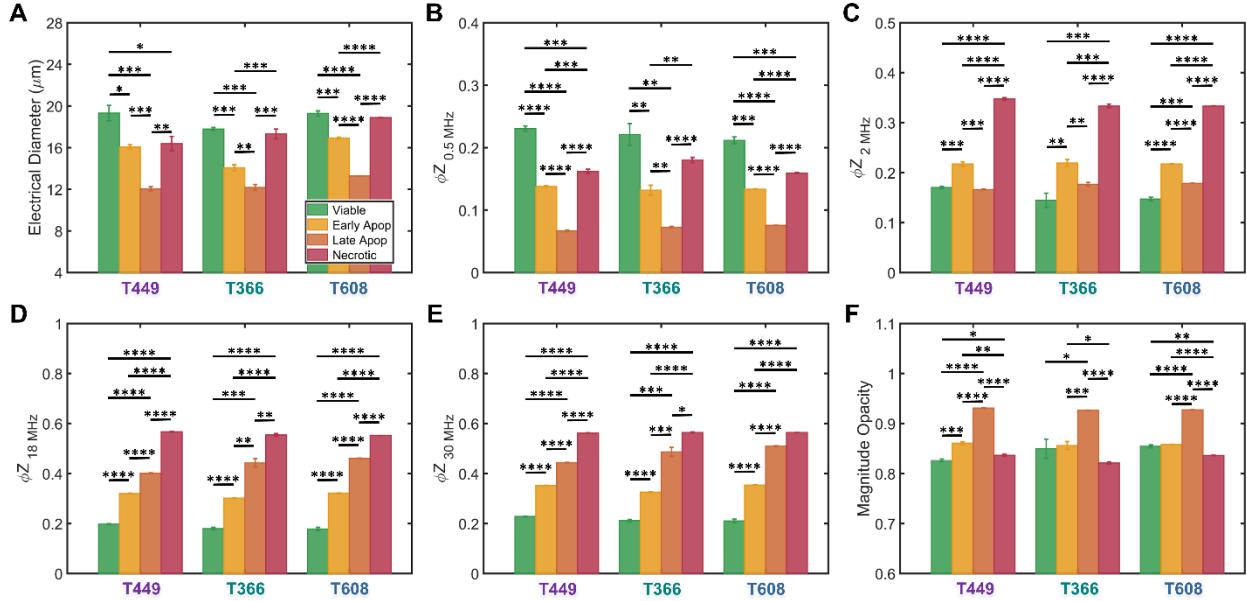

**Figure S5:** Comparison of the impedance cytometry biometrics of electrical diameter (A), impedance phase at 0.5 MHz ( $\phi Z_{0.5\text{MHz}}$ , B), at 2 MHz ( $\phi Z_{2\text{MHz}}$ , C), at 18 MHz ( $\phi Z_{18\text{MHz}}$ , D) and at 30 MHz ( $\phi Z_{30\text{MHz}}$ , E), and magnitude opacity ( $|Z|_{2\text{MHz}} / |Z|_{0.5\text{MHz}}$ , F) for each gemcitabine-treated PDAC cell line (n = 3). Statistical significance: \*p ≤ 0.05 ; \*\*p ≤ 0.01, \*\*\*p ≤ 0.001 and \*\*\*\*p ≤ 0.00001.

## B. Supplementary Methods

### Dielectric Shell Modelling

For the case where a particle is suspended in a dielectric medium, dielectric spectroscopy can be used to measure the dielectric properties of the suspension<sup>1</sup>. This mixture of particle and medium can be approximated to that of a single dispersion using Maxwell's mixture theory (MMT)<sup>2</sup>. MMT can be used to combine the dielectric properties of all parts into an overall complex permittivity of the mixture ( $\tilde{\epsilon}_{\text{mix}}$ ):

$$\tilde{\epsilon}_{\text{mix}} = \tilde{\epsilon}_{\text{medium}}(1 + 3 \varphi \tilde{f}_{\text{CM,mix}}) \quad (\text{S1})$$

where  $\tilde{\epsilon}_{\text{medium}}$  is the complex permittivity of the suspending medium,  $\varphi$  the volume fraction of the particle in the medium, and  $\tilde{f}_{\text{CM,mix}}$  the Clausius–Mossotti factor of the cell in the mixture. In practical terms,  $\tilde{\epsilon}_{\text{mix}}$  describes the change in the medium permittivity, due to the presence of a particle of a given volume and can only be used if the volume fraction is small, *i.e.*,  $\varphi \ll 1$ . For the case of a cell in suspending medium, MMT-based, shell models can be used to retrieve the dielectric properties of the cell<sup>3–5</sup>. While cells have an intricate internal structure surrounded by a membrane, a simplified approximation can be used based on shell models, wherein a cell is described as a series of  $n$  concentric shells with defined dielectric properties (**Figure S6A**). In a standard single-model, there are two dispersions, corresponding to the existing interfaces, *i.e.* medium-membrane and membrane-interior.

For a shell model, the Clausius–Mossotti factor of the cell in the mixture is given by:

$$\tilde{f}_{CM,mix} = \frac{\tilde{\epsilon}_{particle} - \tilde{\epsilon}_{medium}}{\tilde{\epsilon}_{particle} + 2\tilde{\epsilon}_{medium}} \quad (S2)$$

The complex permittivity of the cell,  $\tilde{\epsilon}_{particle}$ , is an aggregation of the complex permittivities of all the  $n$  shells modelled for the particle, and represents the final dispersion, typically corresponding to medium and cell membrane. The complex permittivity of any dispersion can be calculated as:

$$\tilde{\epsilon}_{n,n+1} = \tilde{\epsilon}_n \frac{\gamma_{n-1,n}^3 + 2\left(\frac{\tilde{\epsilon}_{n+1} - \tilde{\epsilon}_n}{\tilde{\epsilon}_{n+1} + 2\tilde{\epsilon}_n}\right)}{\gamma_{n-1,n}^3 - \left(\frac{\tilde{\epsilon}_{n+1} - \tilde{\epsilon}_n}{\tilde{\epsilon}_{n+1} + 2\tilde{\epsilon}_n}\right)} \quad (S3)$$

with,

$$\gamma_{n-1,n} = \frac{r_{n-1}}{r_n} \quad (S4)$$

where  $r$  is the radius of the shell being modeled. The complex permittivities of each specific shell can in turn be calculated using:

$$\tilde{\epsilon}_n = \epsilon_0 \epsilon_n - i \frac{\sigma_n}{\omega} \quad (S5)$$

where  $\epsilon_n$  and  $\sigma_n$  can be ranges of permittivities and conductivities, respectively, being tested with the model for each  $n$  shell; while  $\epsilon_0$  is the constant vacuum permittivity ( $8.85 \times 10^{-12} \text{ F m}^{-1}$ ) and  $\omega$  is the angular frequency along the frequency spectrum measured. By calculating of each shell, and using **Equation S1**, it is then possible to calculate the dielectric decrement due to the presence of the particle in the suspending medium between the measurement electrodes. Thus, the impedance of the mixture ( $\tilde{Z}_{mix}$ ) can be obtained:

$$\tilde{Z}_{mix} = 1 / i\omega \tilde{\epsilon}_{mix} G_f \quad (S6)$$

where  $i^2 = -1$ ,  $\omega$  is the angular frequency, and  $G_f$  is the geometric constant of the system. For an ideal parallel plate electrode system,  $G_f$  is simplified to  $A_{electrode} / d_{electrode}$ , where  $A_{electrode}$  is the electrode surface area and  $d_{electrode}$  is the separation distance between electrodes.

Given the frequency-dependence of  $\tilde{Z}_{mix}$ , relaxation curves for the impedance magnitude and phase can be calculated using:

$$|\tilde{Z}_{mix}| = \sqrt{\text{Re}(\tilde{Z}_{mix})^2 + \text{Im}(\tilde{Z}_{mix})^2} \quad (S7)$$

$$\phi \tilde{Z}_{mix} = \arctan \left( \frac{\text{Im}(\tilde{Z}_{mix})}{\text{Re}(\tilde{Z}_{mix})} \right) \quad (S8)$$

An iterative algorithm can be implemented to calculate these curves for a wide spectrum of combinations between different electrophysiology metrics (e.g. varying particle size, membrane conductivity or internal conductivity; **Figure S6B-F**).

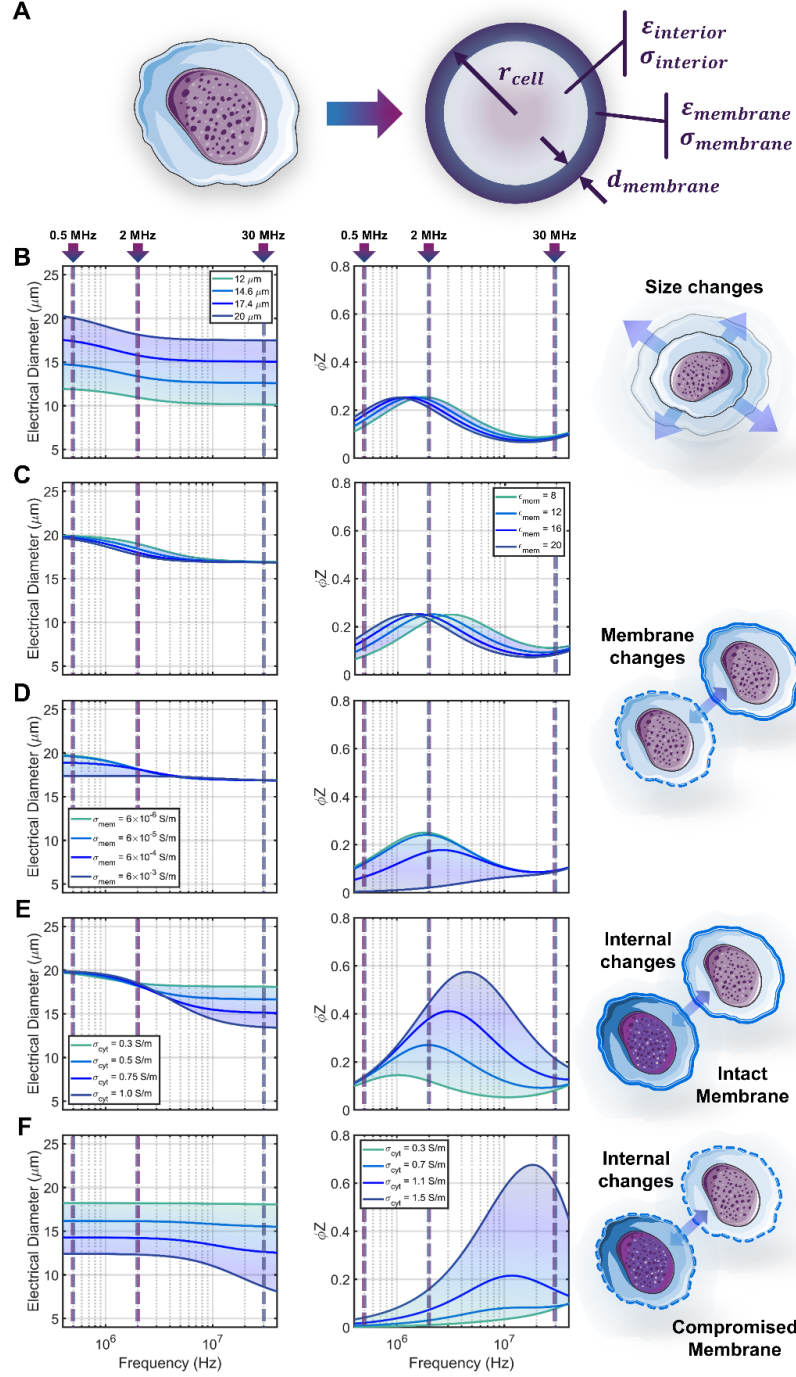

**Figure S6: Dielectric shell modelling.** A – An equivalent single-shell model of a biological cell in a suspending medium, obtained through Maxwell's mixture theory. Modelled electrical diameter and impedance phase ( $\phi Z$ ) for a variety of different alterations to the dielectric properties: B – cell size ( $r_{cell}$  from 6 to 10  $\mu\text{m}$ , C – membrane permittivity ( $\epsilon_{mem}$  from 8 to 20), D – membrane conductivity ( $\sigma_{mem}$  from  $6 \times 10^{-6}$  to  $6 \times 10^{-3}$ ), E – internal conductivity ( $\sigma_{int}$  from 0.3 to 1.0  $\text{S m}^{-1}$ , assuming  $\epsilon_{mem} = 14$  and  $\sigma_{mem} < 1 \times 10^{-6} \text{ S m}^{-1}$ ), and F – internal conductivity ( $\sigma_{int}$  from 0.3 to 1.5  $\text{S m}^{-1}$ , assuming  $\epsilon_{mem} = 14$  and  $\sigma_{mem} = 6 \times 10^{-3} \text{ S m}^{-1}$ ). Cells modelled using a single-shell model with the following set of dielectric properties (if not being varied at each

individual sub-figure case):  $d_{mem} = 10 \text{ nm}$ ,  $\epsilon_{mem} = 14$ ,  $\sigma_{mem} < 1 \times 10^{-6} \text{ S m}^{-1}$ ,  $\epsilon_{int} = 60$ ,  $\sigma_{int} = 0.5 \text{ S m}^{-1}$ ,  $\epsilon_{medium} = 80$ ,  $\sigma_{medium} = 1.6 \text{ S m}^{-1}$ ,  $d_{electrode} = 50 \text{ }\mu\text{m}$ ,  $A_{electrode} = 2.5 \times 10^{-9} \text{ m}^2$ .

## References

1. Morgan, H. & Green, N. G. *AC Electrokinetics: colloids and nanoparticles*. (Research Studies Press Ltd., 2002).
2. Maxwell, J. C. *A treatise on electricity and magnetism. A treatise on electricity and magnetism* **1**, (Clarendon Press, 1881).
3. Hanai, T., Koizumi, N. & Irimajiri, A. A method for determining the dielectric constant and the conductivity of membrane-bounded particles of biological relevance. *Biophys. Struct. Mech.* **1**, 285–294 (1975).
4. Huang, Y., Hölzel, R., Pethig, R. & Wang, X. B. Differences in the AC electrodynamics of viable and non-viable yeast cells determined through combined dielectrophoresis and electrorotation studies. *Phys. Med. Biol.* **37**, 1499–1517 (1992).
5. Irimajiri, A., Hanai, T. & Inouye, A. A dielectric theory of ‘multi-stratified shell’ model with its application to a lymphoma cell. *J. Theor. Biol.* **78**, 251–269 (1979).
